# Supplementary material for: Memory characteristics of organic field-effect memory transistors modulated by nano-p–n junctions
Source: Royal Society of Chemistry journal article supplement (doi:10.1039/d0tc01233e), 2020-01-01
Supplement: d0tc01233e1.pdf [file d0tc01233e1.pdf]

## Electronic Supplementary Information

### Memory characteristics of organic field-effect memory transistors modulated by nano-p-n junctions

*Wei-Yang Chou,<sup>\*a</sup> Sheng-Kuang Peng,<sup>a</sup> Fu-Chiao Wu,<sup>a</sup> Hwo-Shuenn Sheu,<sup>b</sup> Yu-Fu Wang,<sup>a</sup> Po-Kang Huang<sup>a</sup> and Horng-Long Cheng<sup>a</sup>*

<sup>a</sup> Department of Photonics, Advanced Optoelectronic Technology Center, National Cheng Kung University, Tainan 701, Taiwan.

<sup>b</sup> National Synchrotron Radiation Research Center, Hsinchu 300, Taiwan.

\* Email of Corresponding author: [weiyang@mail.ncku.edu.tw](mailto:weiyang@mail.ncku.edu.tw)

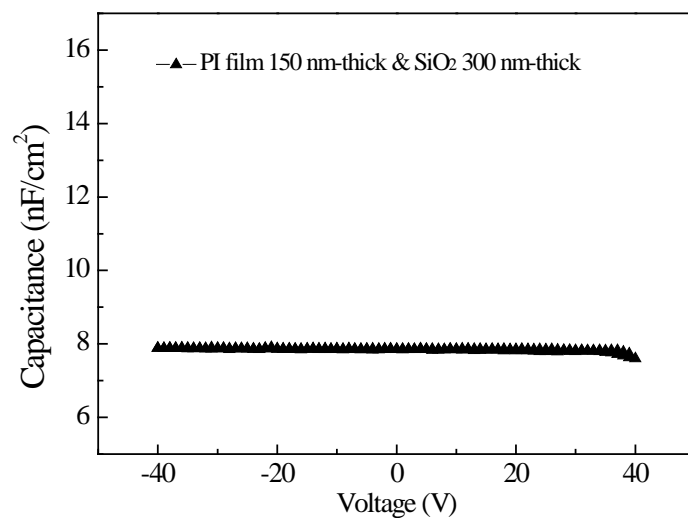

**Fig. S1** The capacitances of PI/SiO<sub>2</sub>/Si gate dielectrics measured at frequencies of 1 kHz.

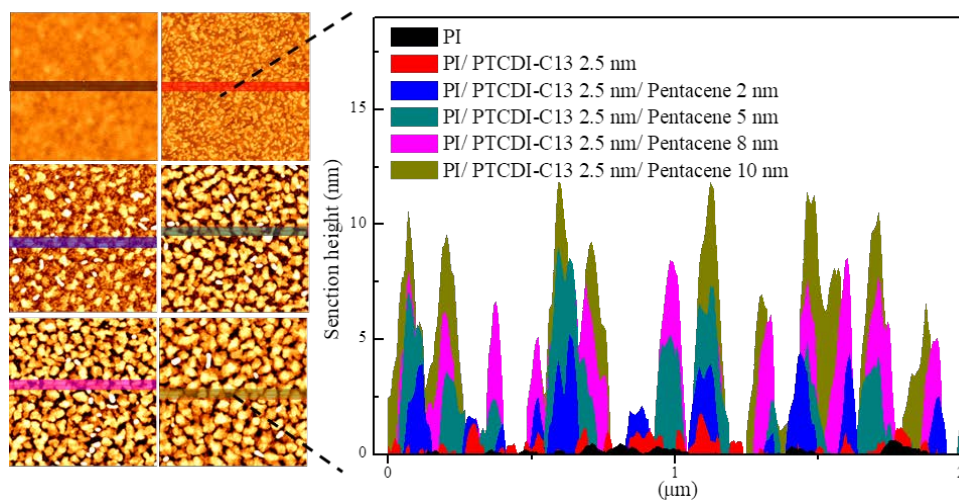

**Fig. S2** The AFM images (left column) and related cross-section analyses (right column) of the pentacene films deposited onto PI/submonolayer PTCDI-C13.
